# Supplementary material for: Fabrication of Glutaraldehyde Vapor Treated PVA/SA/GO/ZnO Electrospun Nanofibers with High Liquid Absorbability for Antimicrobial of Staphylococcus aureus
Source: Nanomaterials (Basel). 2023 Mar 3;13(5):932. doi: 10.3390/nano13050932 (PMC10004850; doi:10.3390/nano13050932)
Supplement: Supplementary file 1 [file nanomaterials-13-00932-s001.zip › nanomaterials-2243023-supplementary.pdf]

# Supplementary Information

Fabrication of glutaraldehyde vapor treated PVA/SA/GO/ZnO electrospun nanofibers  
with high liquid absorbability for antimicrobial of *staphylococcus aureus*

Yi-Hsin Chien<sup>1</sup>, Meng-Tzu Ho<sup>1</sup>, Chin-Hsign Feng<sup>2</sup>, Jung-Hsign Yen<sup>2</sup>, Yi-Chan Chang<sup>1</sup>, Chih-Sheng  
Lai<sup>2</sup>, Rong-Fuh Louh<sup>\*1</sup>

<sup>1</sup>Department of Materials Science, Feng Chia University, Taichung, Taiwan 40724

<sup>2</sup>Division of Plastic Surgery, Taichung Veterans General Hospital, Taichung, Taiwan

\*Correspondence author: rflouh@fcu.edu.tw

**Table S1.** PVA/SA nanofilms made by 8 ml DI solution and their viscosities were detected by cone and plate viscometer.

| PVA (wt%) | DI water (ml) | SA (wt%) | Voltage (kV) | Work Distance (cm) | Flow Rate (ml/hr) | Viscosity (cP) |
|-----------|---------------|----------|--------------|--------------------|-------------------|----------------|
| 5         | 8             | 2        | 15           | 15                 | 0.5               | 93             |
| 6         | 8             | 2        | 15           | 15                 | 0.5               | 198            |
| 7         | 8             | 2        | 15           | 15                 | 0.5               | 355            |
| 8         | 8             | 2        | 15           | 15                 | 0.5               | 734            |

**Table S2.** Different addition of 2 wt% SA precursors and their viscosities detected by cone and plate viscometer.

| PVA (wt%) | 2 wt% SA (ml) | Voltage (kV) | Work Distance (cm) | Flow Rate (ml/hr) | Viscosity (cP) |
|-----------|---------------|--------------|--------------------|-------------------|----------------|
| 7         | 0.5           | 15           | 15                 | 0.5               | 432            |
| 7         | 1             | 15           | 15                 | 0.5               | 355            |
| 7         | 1.5           | 15           | 15                 | 0.5               | 295            |

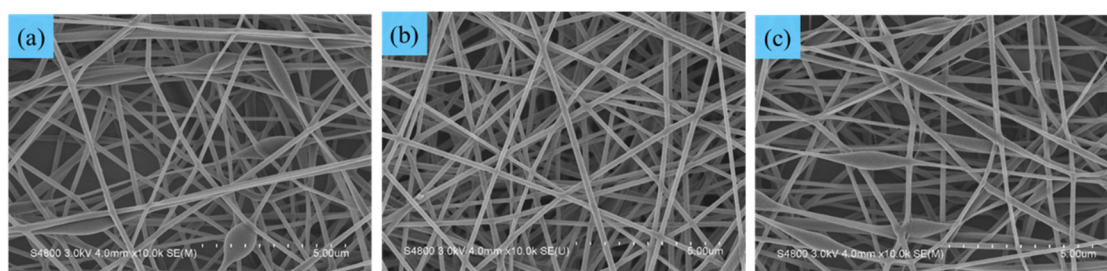

**Figure S1.** The SEM images of PVA/SA nanofibers with the different added amounts of 2 wt% SA of (a) 0.5 ml, (b) 1.0 ml, and (c) 1.5 ml.

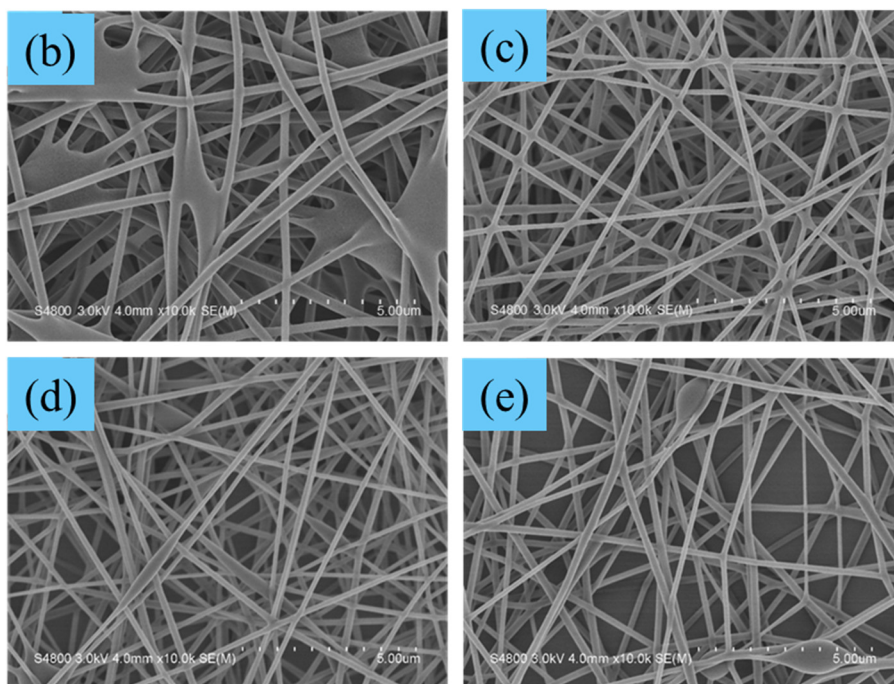

**Figure S2.** The SEM images of PVA/SA nanofibers with the different added amounts of 2 wt% SA of (a) 0.5 ml, (b) 1.0 ml, and (c) 1.0 ml.

**Table S3.** Mechanical properties of PVA/SA/GO fibers with different compositions.

|                       | Tensile<br>Strength | Elongation<br>before Fracturing |
|-----------------------|---------------------|---------------------------------|
|                       | (MPa)               | (%)                             |
| PVA                   | 1.66±0.01           | 35.16±2.67                      |
| PVA/SA                | 1.52±0.04           | 30.84±0.64                      |
| PVA/SA/<br>0.3 wt% GO | 1.61±0.07           | 26.07±0.81                      |
| PVA/SA/<br>0.5 wt% GO | 1.77±0.02           | 25.54±1.10                      |
| PVA/SA/<br>0.7 wt% GO | 1.75±0.03           | 24.76±2.09                      |
| PVA/SA/<br>1.0 wt% GO | 2.03±0.05           | 11.69±5.71                      |

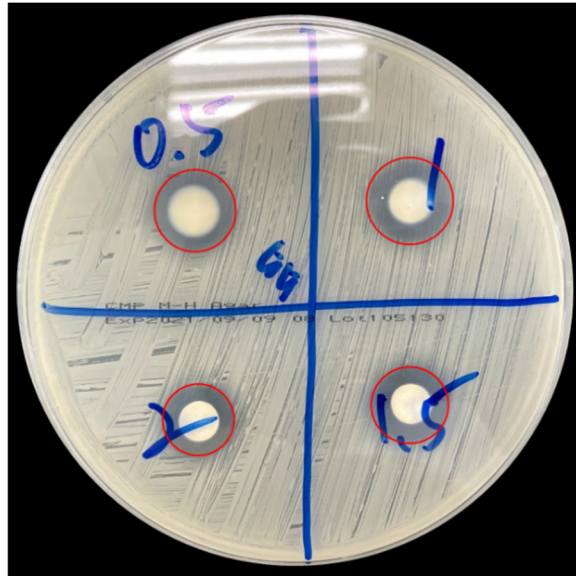

**Figure S3.** The antibacterial test results of *Staphylococcus aureus* with zinc oxide (ZnO) were prepared with different NaOH concentrations.

**Table S4.** Mechanical properties of PVA/SA/GO/ZnO fibers with different compositions.

| Cross-linking<br>Time<br>(hr) | Tensile<br>Strength<br>(MPa) | Elongation at<br>Break<br>(%) |
|-------------------------------|------------------------------|-------------------------------|
| 0                             | 1.87±0.04                    | 6.03±0.49                     |
| 12                            | 2.00±0.08                    | 5.98±0.49                     |
| 24                            | 2.30±0.14                    | 5.69±0.24                     |
| 48                            | 2.43±0.16                    | 5.28±0.72                     |
| 72                            | 2.30±0.06                    | 4.98±0.66                     |

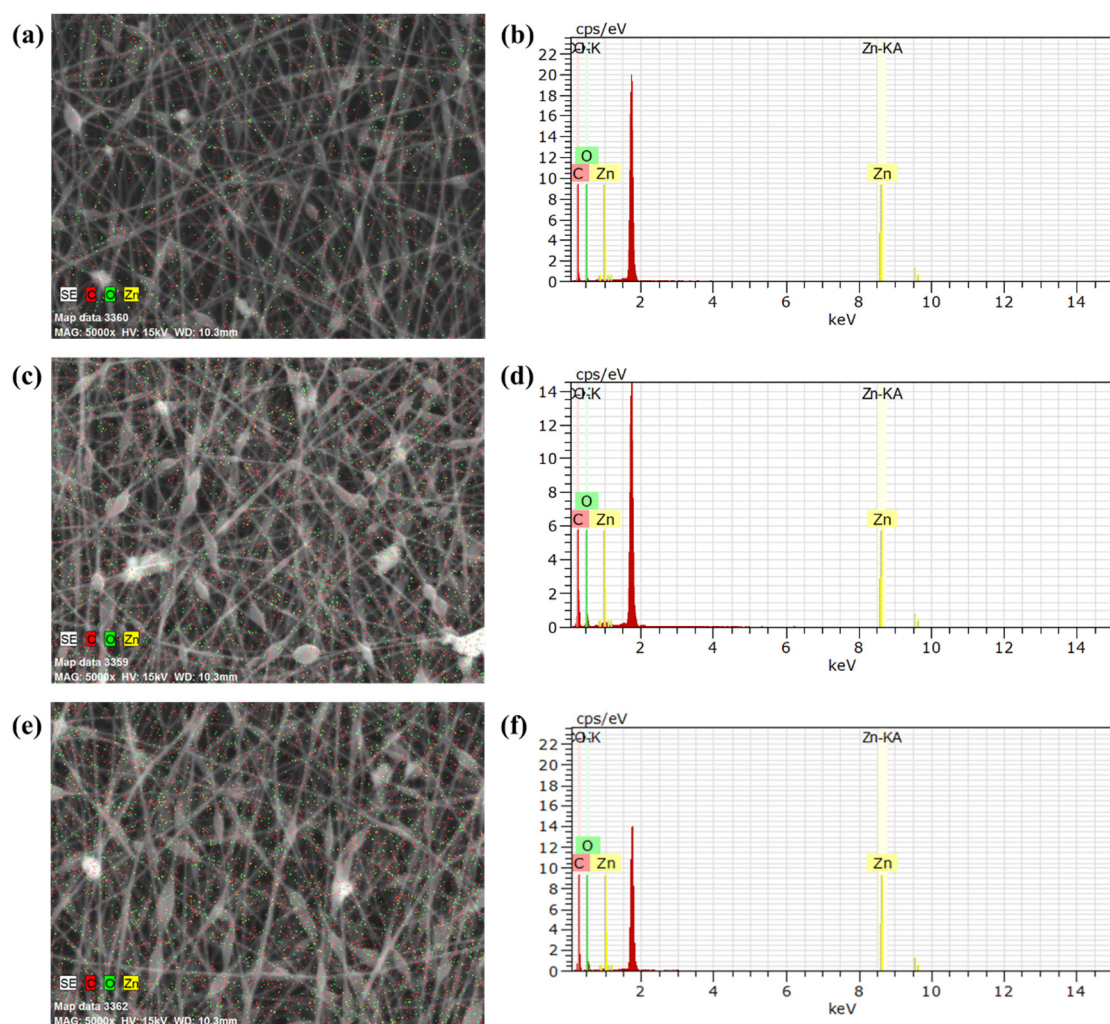

**Figure S4.** The EDS mapping (carbon, oxygen, and zinc) and EDS spectrum of PVA/SA/GO/ZnO nanofibers through GA vapor cross-linking reaction within (a)-(b) 24 hours, (c)-(d) 48 hours, and (e)-(f) 72 hours.
